# Supplementary material
Source: PubMed Central journal article supplement (PMC5315497)
Supplement: NIHMS698050-supplement-Supplemental.pdf [file NIHMS698050-supplement-Supplemental.pdf]

Molecular Cell, Volume 58

## **Supplemental Information**

### **SMADs and YAP Compete to Control Elongation of $\beta$ -Catenin:LEF-1-Recruited RNAPII during hESC Differentiation**

Conchi Estarás, Chris Benner, and Katherine A. Jones

A

### Top LEF-1 binding motifs

TCF/HMG (1e-549)



OCT:SOX (1e-68)



B

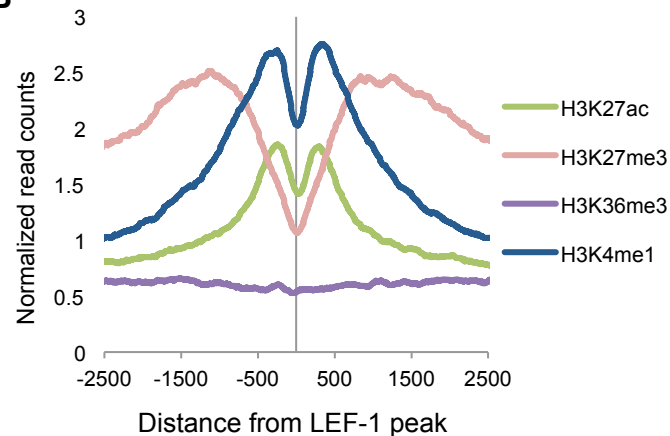

C

### H3K27ac ChIP

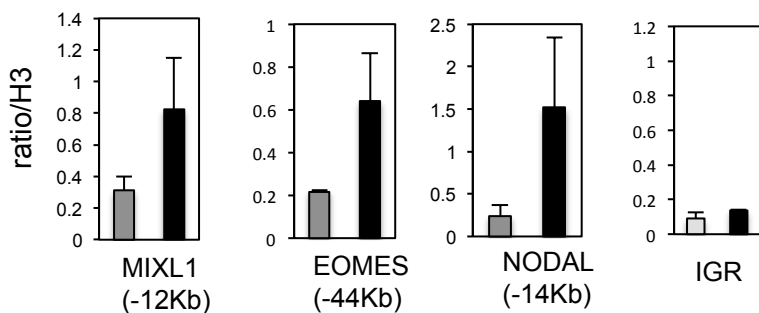

### H3K4me1 ChIP

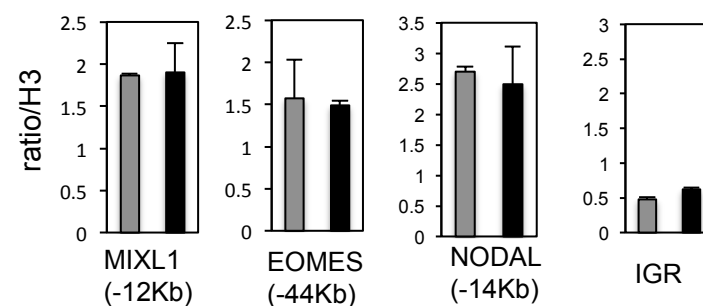

### P300 ChIP

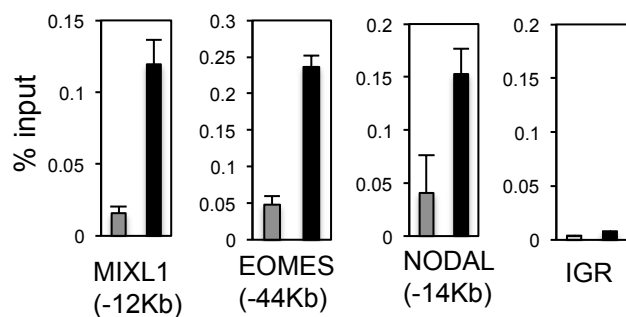

### BRG1 ChIP

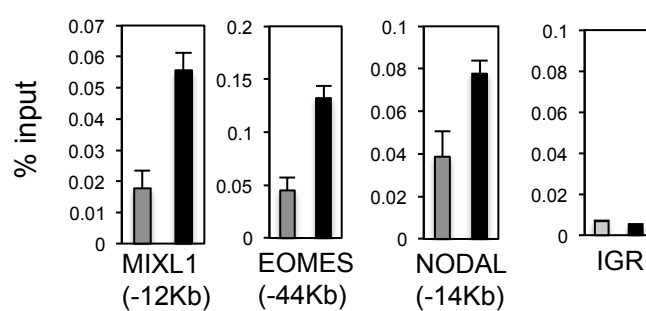

### EZH2 ChIP

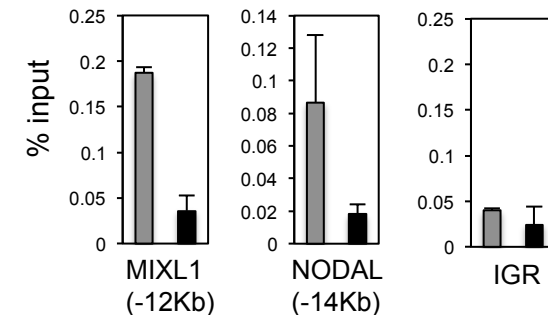

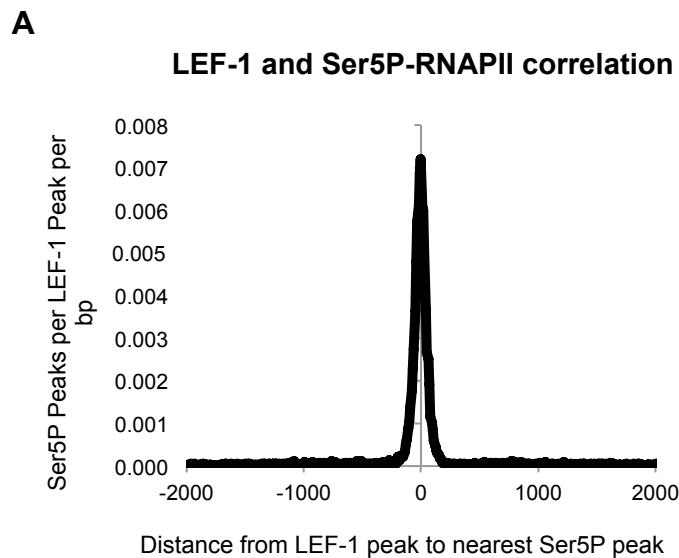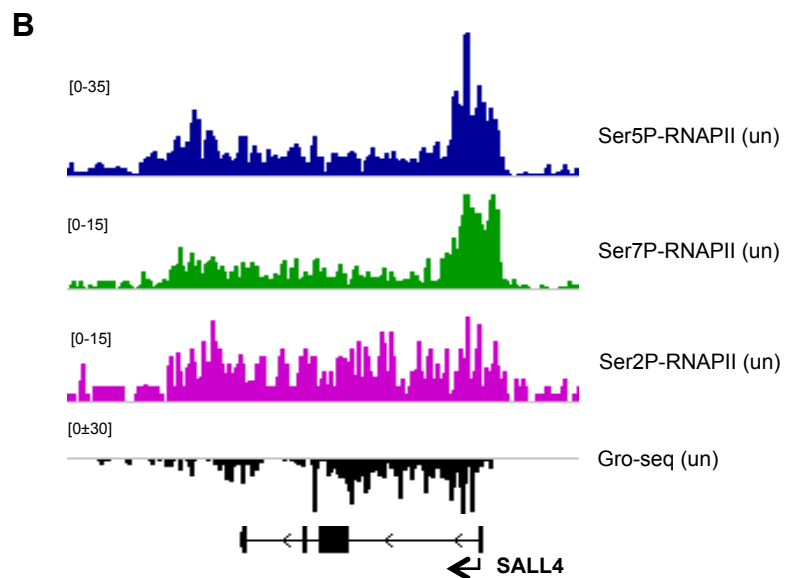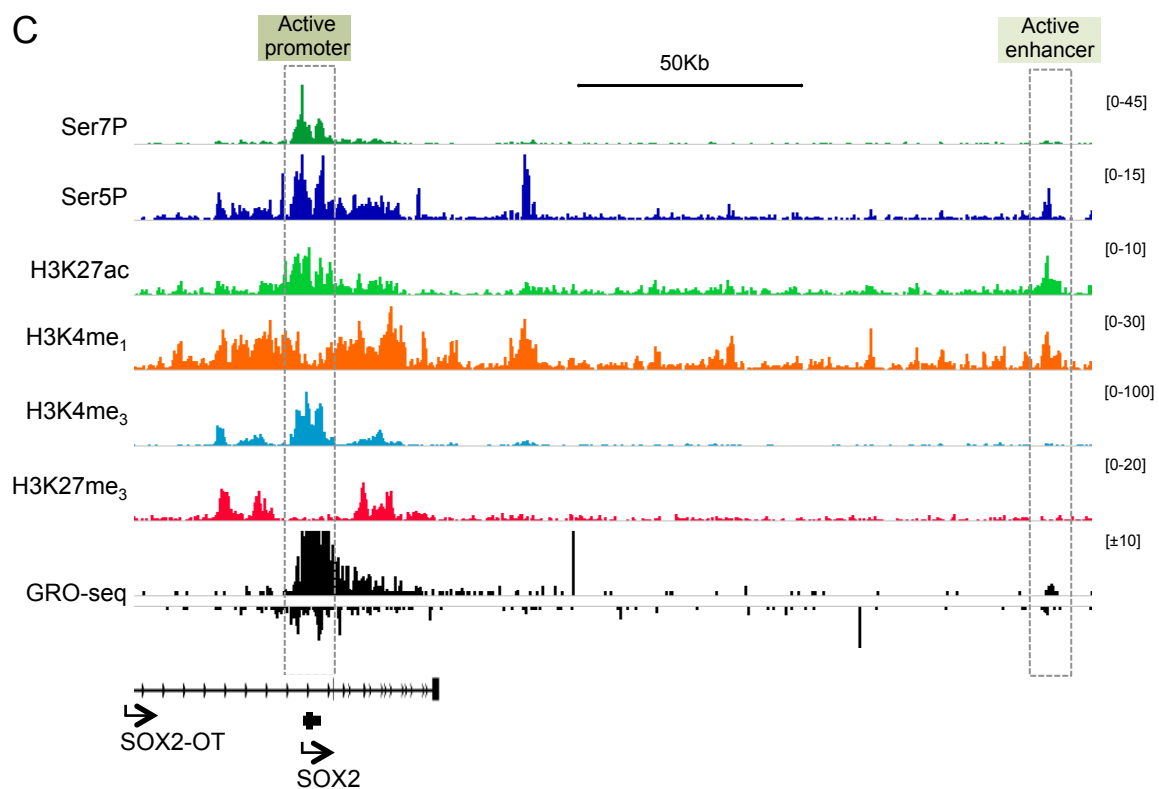

**D**

| Ser5P and Ser7P RNAPII in Promoters and Enhancers         |                      |
|-----------------------------------------------------------|----------------------|
| Active enhancer (K4me <sub>1</sub> : K27ac)               | <b>Ser5P↑ Ser7P↓</b> |
| Poised enhancer (K4me <sub>1</sub> : K27me <sub>3</sub> ) | <b>Ser5P↑ Ser7P↓</b> |
| Active promoter                                           | <b>Ser5P↑ Ser7P↑</b> |
| Poised promoter                                           | <b>Ser5P↑ Ser7P↓</b> |
| Inactive promoter                                         | <b>Ser5P↓ Ser7P↓</b> |

**A**

**Wnt3a-induced transcriptome in hESCs**

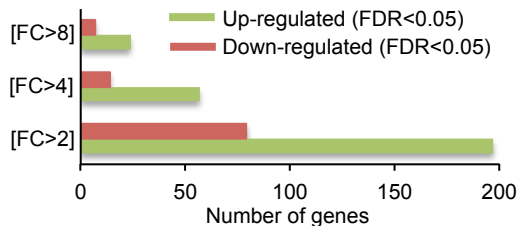

**B**

| GO term (Wnt3a induced genes)                   | FDR         |
|-------------------------------------------------|-------------|
| GO:0007275~multicellular organismal development | 3.19E-07    |
| GO:0032502~developmental process                | 1.50E-06    |
| GO:0048731~system development                   | 5.55E-06    |
| GO:0014032~neural crest cell development        | 2.74E-05    |
| GO:0014033~neural crest cell differentiation    | 2.74E-05    |
| GO:0014031~mesenchymal cell development         | 2.92E-05    |
| GO:0048762~mesenchymal cell differentiation     | 3.12E-05    |
| GO:0060485~mesenchyme development               | 3.66E-05    |
| GO:0001667~ameboidal cell migration             | 6.40E-05    |
| GO:0001755~neural crest cell migration          | 7.52E-05    |
| GO:0048856~anatomical structure development     | 8.35E-05    |
| GO:0032501~multicellular organismal process     | 1.39E-04    |
| GO:0030154~cell differentiation                 | 5.22E-04    |
| GO:0007399~nervous system development           | 6.98E-04    |
| GO:0048869~cellular developmental process       | 0.001429587 |
| GO:0005576~extracellular region                 | 0.005368669 |
| GO:0009887~organ morphogenesis                  | 0.005949419 |
| GO:0016055~Wnt receptor signaling pathway       | 0.006154679 |
| GO:0005576~extracellular region                 | 0.006244501 |
| GO:0048513~organ development                    | 0.00629155  |
| GO:0044421~extracellular region part            | 0.008916906 |
| GO:0031012~extracellular matrix                 | 0.011001359 |
| GO:0031012~extracellular matrix                 | 0.013161438 |
| GO:0016477~cell migration                       | 0.013756399 |
| GO:0016477~cell migration                       | 0.014989624 |
| GO:0009888~tissue development                   | 0.015374614 |
| GO:0005578~proteinaceous extracellular matrix   | 0.025934456 |
| GO:0009790~embryonic development                | 0.02625073  |
| GO:0005578~proteinaceous extracellular matrix   | 0.030762369 |
| hsa05217:Basal cell carcinoma                   | 0.034980386 |
| GO:0048468~cell development                     | 0.036297817 |
| GO:0048870~cell motility                        | 0.03982481  |
| GO:0051674~localization of cell                 | 0.043306283 |
| GO:0048870~cell motility                        | 0.043306283 |
| hsa04310:Wnt signaling pathway                  | 0.047720187 |

**C**

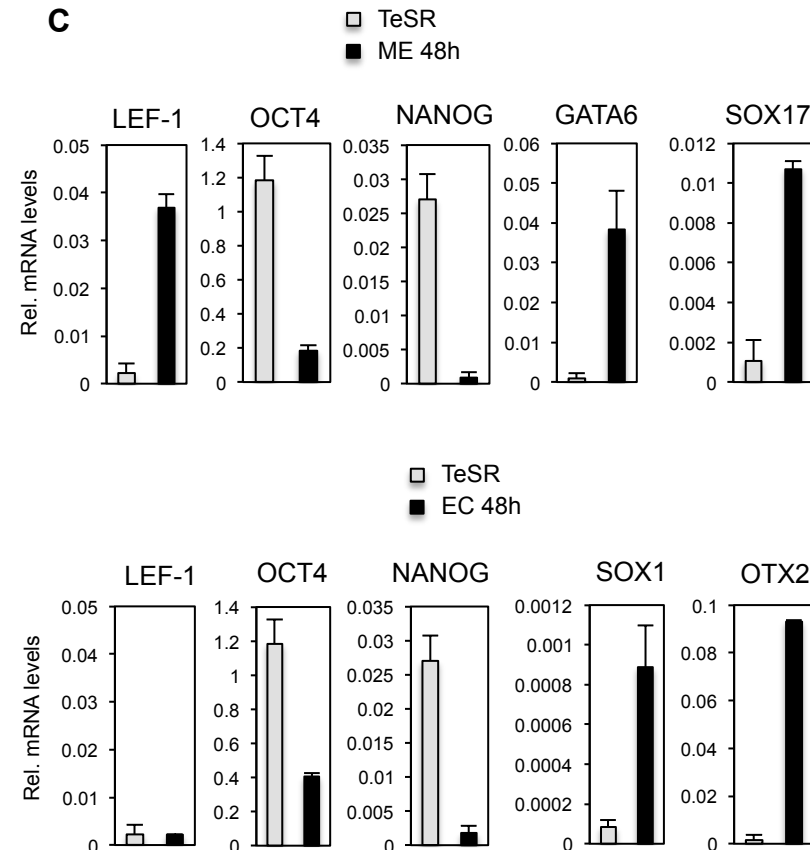

A

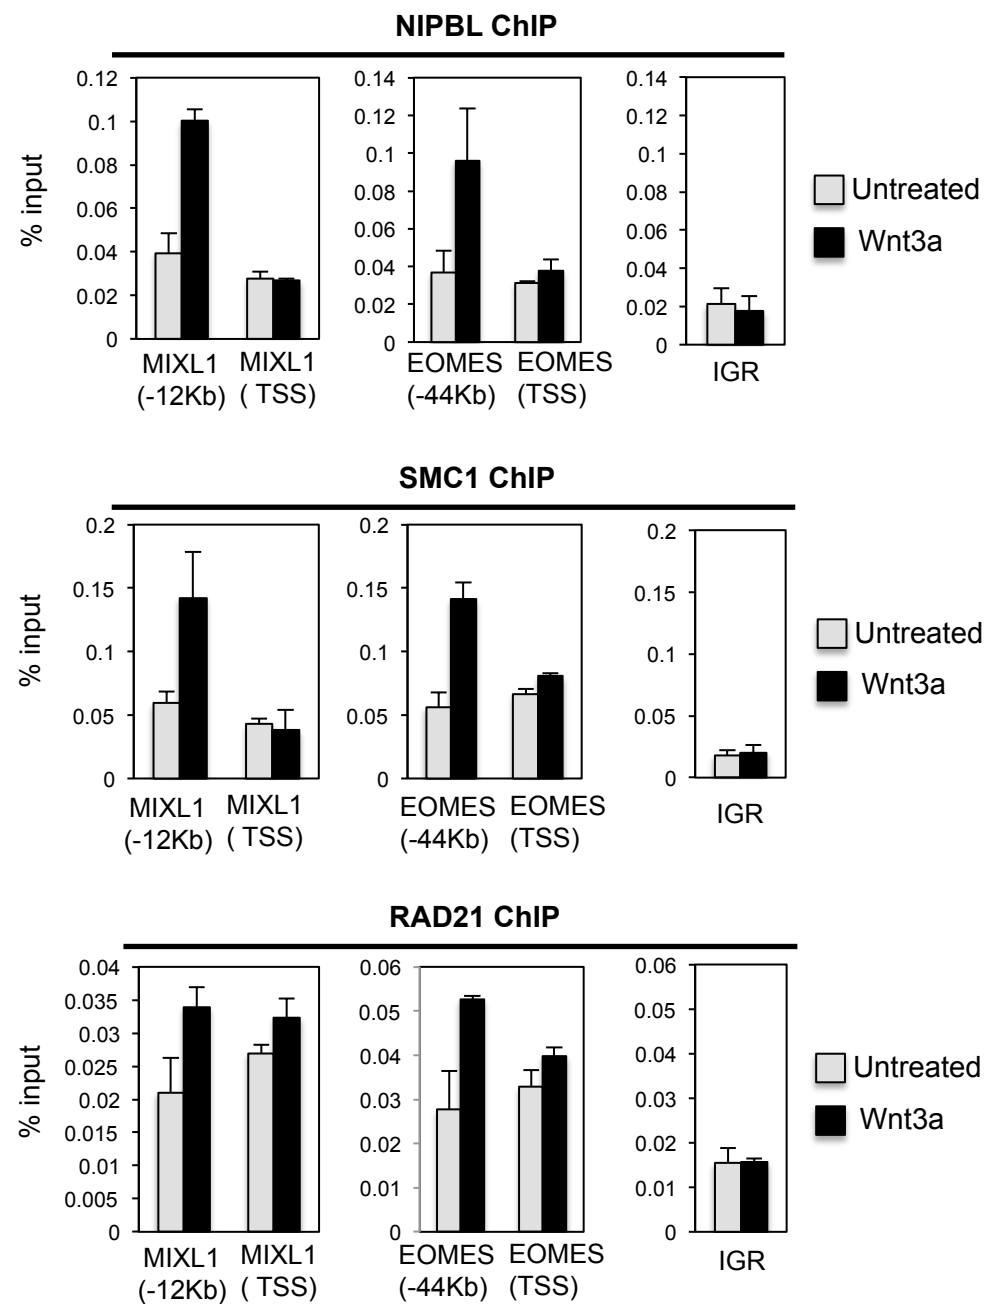

B

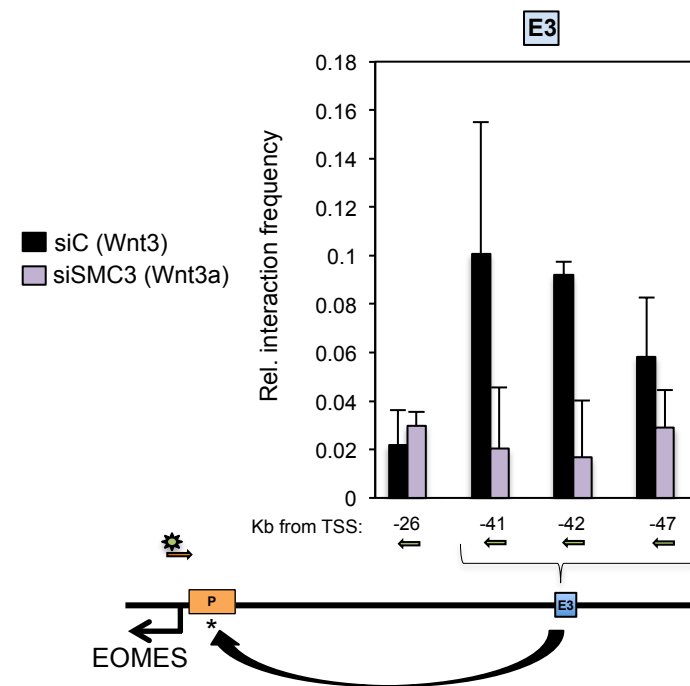

C

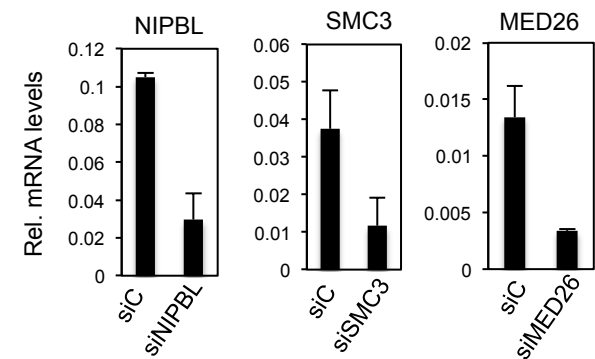

**A**

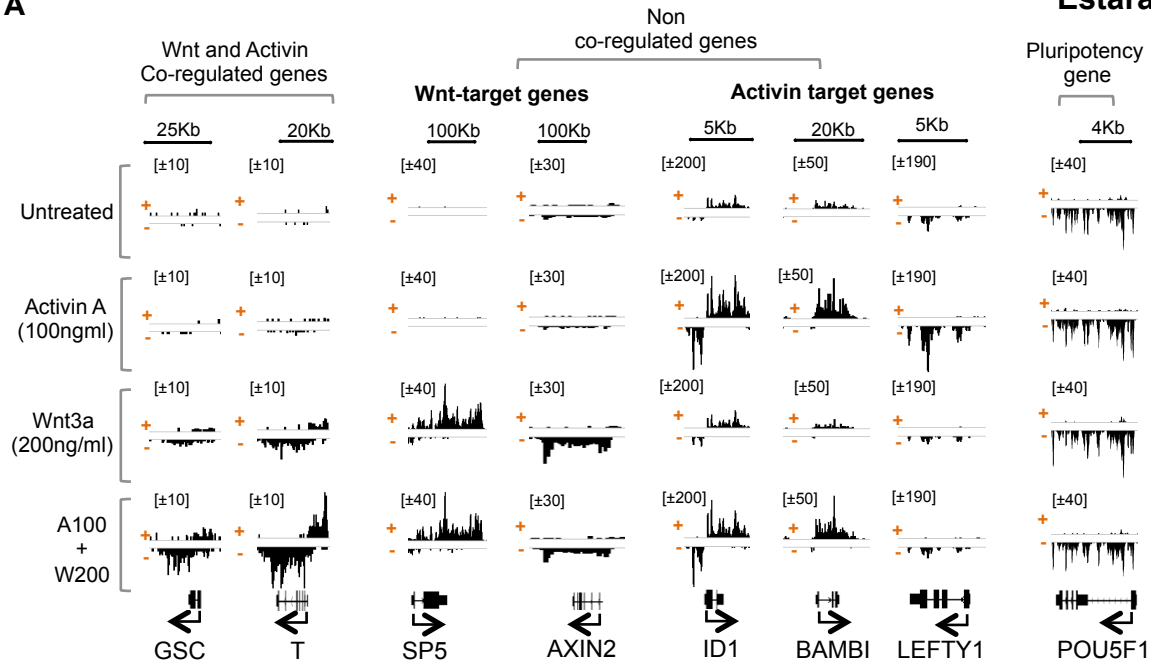

**B**

| GO description of co-regulated genes | FDR                   |
|--------------------------------------|-----------------------|
| Multicellular org.development        | 1.35-E <sup>-06</sup> |
| System development                   | 3.03-E <sup>-05</sup> |
| Anat. struct. dev.                   | 3.04-E <sup>-05</sup> |
| Developmental process                | 9.56-E <sup>-05</sup> |
| Organ development                    | 2.60-E <sup>-02</sup> |
| Pattern specif. process              | 6.99-E <sup>-02</sup> |
| Glycosylation site:N-linked          | 2.05-E <sup>-02</sup> |

**C**

Overlapping peaks in co-regulated genes (±100Kb TSS)

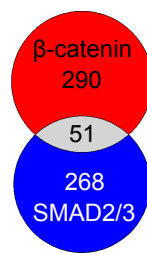

**D**

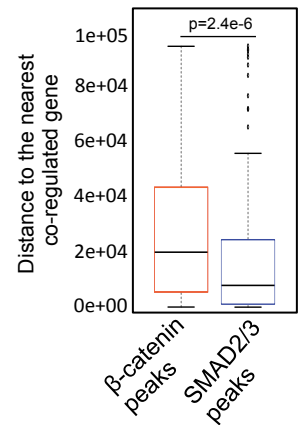

**E**

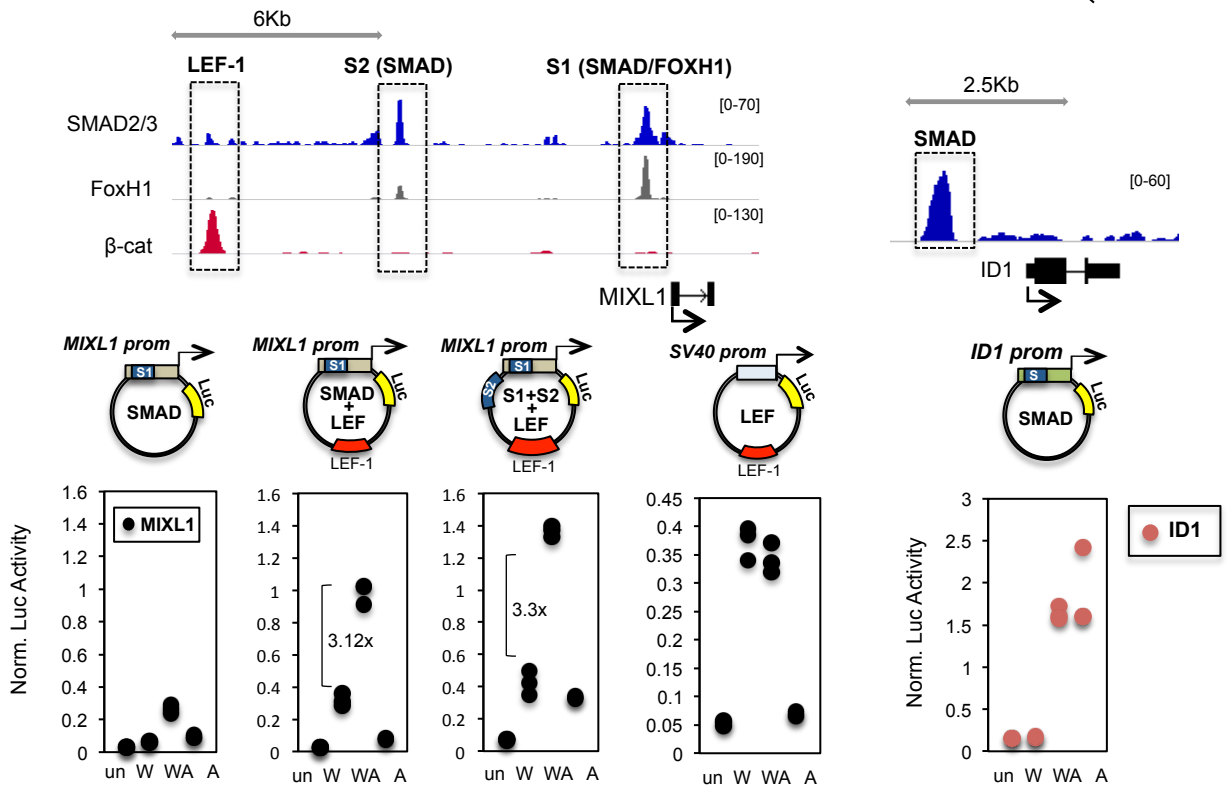

**A**

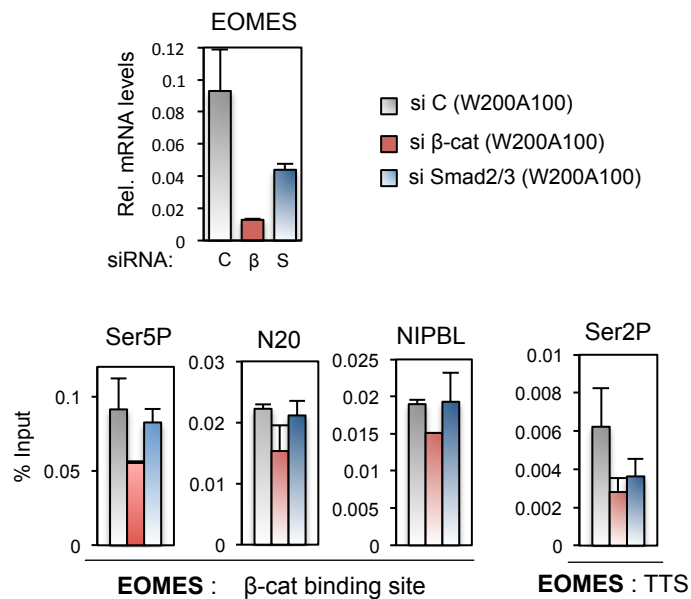

**B**

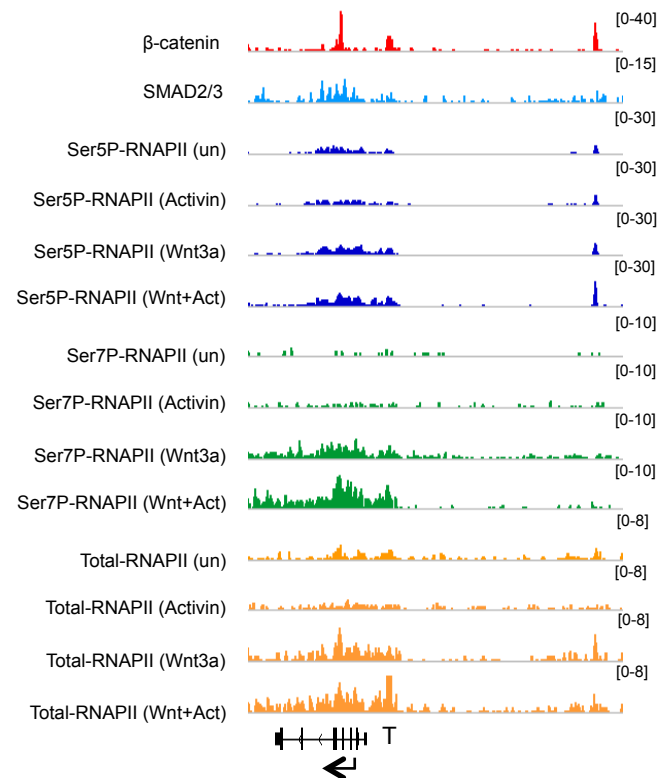

**C**

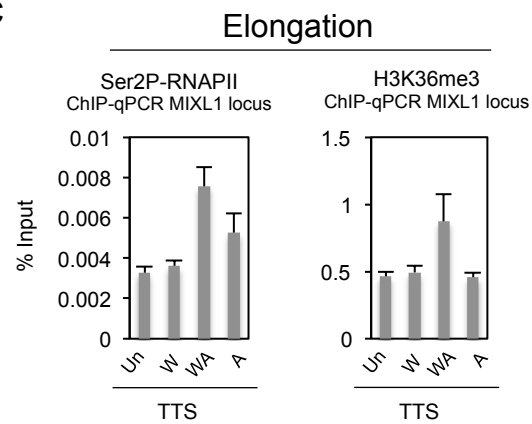

**D**

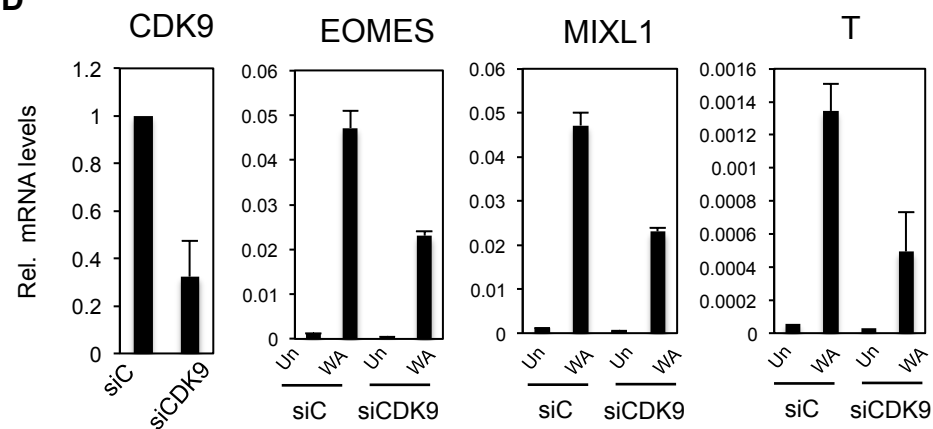

**A** un W200A100  
siC siYAP siC siYAP

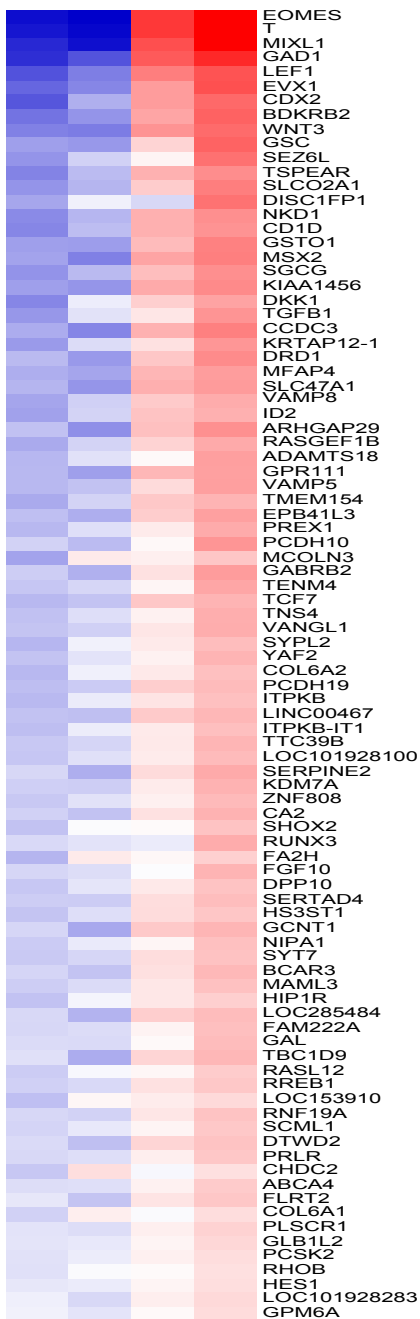

**B**

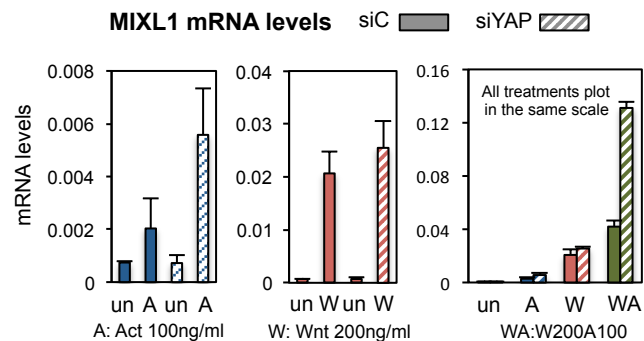

**C**

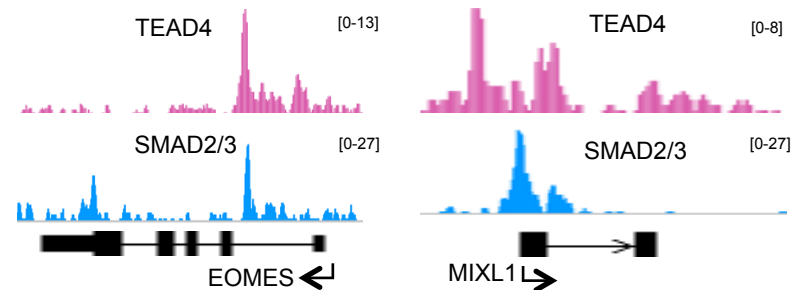

**D**

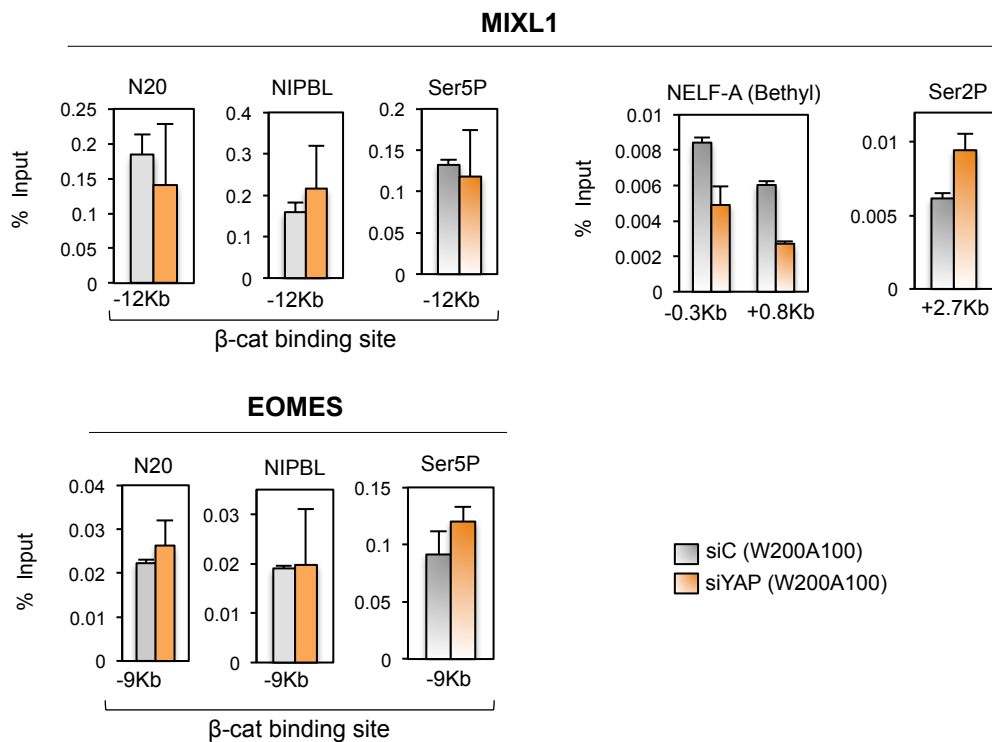



## SUPPLEMENTAL FIGURE LEGENDS

**Figure S1, related to Figure 1. Analysis of  $\beta$ -catenin binding to LEF-1 enhancers in Wnt3a-signaling hESCs.** (A) Top LEF-1 binding motifs in H1 hESCs identified by ChIP-seq. (B) Histogram profile of histone modifications at LEF-1 binding sites genomewide. (C) ChIP-qPCR analysis at ME genes in untreated and Wnt3a treated hESCs (4h). The antibodies used are shown above each panel, and the genes analyzed are indicated at the bottom. Mean (SD; n=2).

**Figure S2, related to Figure 2. RNAPII complexes at LEF-1 sites and hESC enhancers are enriched in CTD-Ser5P, but not -Ser7P.** (A) Metaprofile showing the correlation between Ser5P-RNAPII and LEF-1 peaks in self-renewal H1 hESCs. (B) Capture showing ChIP-seq analysis of RNAPII -Ser5P, -Ser7P and -Ser2P and GRO-seq profiles at the active *SALL4* gene in untreated hESCs. (C) Genome browser capture shows examples of the ChIP-seq profile at the pluripotency gene, *SOX2*. Specific antibodies used are shown at the left. Scale bar and gene diagram are depicted above and below the capture, respectively. The dashed boxes highlight active enhancer and promoter regions, as indicated at the top. (D) Table summarizing the data in Figure 2. Note that enhancers are enriched in Ser5P-RNAPII, with low Ser7P, regardless their activation status.

**Figure S3, related to Figure 3. GRO-seq analysis of Wnt3a-induced genes in hESCs.** (A) Diagram indicating the number of genes induced (green) or repressed (red) in response to Wnt3a (200ng/ml, t=6h) in hESC GRO-seq experiments. Absolute fold change ([FC]) is shown in the vertical axis. (B) List of GO categories associated with Wnt3a-induced genes in hESCs. (C) hESCs were differentiated to mesoendoderm (ME; top panel) or ectoderm (EC; bottom panel) progenitors (see Experimental Procedures) for two days. Graphs show relative mRNA levels of the *LEF-1* gene, as well as lineage-specific marker genes for the ME (upper graph) and EC (lower graph) precursor cells. Mean (SD; n=2).

**Figure S4, related to Figure 4.  $\beta$ -catenin recruits cohesin and induces long-range enhancer-promoter looping in Wnt3a-signaling hESCs.** (A) ChIP-qPCR analysis of the recruitment of different cohesin subunits (SMC1, NIPBL and RAD21) before and after Wnt3a treatment (4h) at the *EOMES* and *MIXL1* gene enhancer (enh), promoter (TSS) or a negative control region (IGR). Mean (SD; n=2). (B) A 3C analysis of enhancer-promoter looping in Wnt3a treated hESCs that had been previously transfected with control or SMC3-specific siRNAs. The *EOMES* E3 enhancer (-40Kb from TSS) was analyzed by qPCR. Mean (SD; n=2). (C) qPCR analysis shows that the indicated siRNA treatments affect the mRNA levels of *NIPBL*, *SMC3* and *MED26* genes. Mean (SD; n=2).

**Figure S5, related to Figure 5. Analysis of Wnt-Activin synergy at ME differentiation genes.** (A) Genome browser capture examples of the GRO-seq profile for the Wnt-Activin co-regulated genes *GSC* and *T/Brachyury*, along with Wnt-specific (*AXIN2* and *SP5*) and Activin-specific target genes (*LEFTY*, *ID1*, *BAMBI*). Note that

combined Wnt3a-Activin A treatment only potentiates the developmental, but not canonical, target genes. For comparison, the GRO-seq profile of the active pluripotent *POU5F1* gene is shown on the right. (B) GO categories of 189 identified Wnt3a-Activin A co-regulated genes. (C) Venn diagram showing the overlap of SMAD2,3 and  $\beta$ -catenin peaks within 100Kb of the TSS for the 189 co-regulated genes. (D) Box diagram indicating the distance of SMAD2,3 and  $\beta$ -catenin peaks to the TSS of the nearest co-regulated gene. (E) Graph shows normalized luciferase activity of transfected hESCs treated as indicated below the graph (9h). The *MIXL1* gene regulatory regions were assessed (see capture on top) and four different constructs were tested: 1) SMAD plasmid, which carries SMAD/FOXH1 (-0.3 Kb) element, 2) SMAD+LEF plasmid, which contains the SMAD/FOXH1 promoter element and LEF-1 (-12Kb) sites; 3) SMAD+LEF+S2, which contains the additional SMAD site at -5Kb from TSS and 4) LEF plasmid, which contains the LEF-1 enhancer site and the heterologous SV40 promoter, which lacks SMAD binding sites. On the right, the SMAD site from the *ID1* gene was used as a control for Activin A signaling in these assays. The graphs plot Luciferase activity normalized to Renilla from three independent biological replicates.

**Figure S6, related to Figure 6. Activin/SMAD2,3 signaling stimulates P-TEFb elongation at ME genes.** (A) siRNA-ChIPs in  $\beta$ -catenin- and SMAD2,3-depleted hESCs. Following siRNA transfection (48h), cells were treated with Wnt3a plus Activin A (W200A100, 4h) prior to qPCR-ChIP analysis of the *EOMES* gene, using the antibodies indicated in the legend. The positions of the primers are indicated in the gene diagram. Graph on top show mRNA levels of *EOMES* in the siRNA treated cells. (B) Genome browser capture showing ChIP-seq profiles of *T/Brachyury* regulatory regions in untreated, Wnt3a, Activin A and Wnt+Activin treated cells. Legend on the left shows the IP antibody used and the specific treatment in parenthesis. Gene diagrams are depicted at the bottom. (C) ChIP-qPCR showing Ser2P-RNAPII and H3K36me3 levels at *MIXL1* TTS in response to the indicated treatments (below the graph). (D) qPCR analysis shows mRNA levels of *MIXL1*, *EOMES* and *T* genes in response to Wnt3a+Activin in control (siC) and CDK9-depleted cells (siCDK9). Graph on the left shows the extent to which the siRNA depletion affected endogenous CDK9 mRNA levels. Mean (SD; n=2).

**Figure S7, related to Figure 7. Wnt-Activin synergy overcomes YAP inhibition of elongation at ME genes.** (A) Heatmap showing the expression levels of the 89 Wnt3a+Activin co-regulated genes affected by YAP depletion in H1 hESCs. (B) Analysis of *MIXL1* mRNA levels in YAP-depleted (dashed) or control (solid) hESCs treated with Activin A alone (blue), Wnt3a alone (red) or both cytokines (green). Mean +SD (n=2). Note that different scales are used for the three graphs, and that the graph at right shows the response to the 3 treatments plotted at the same scale. (C) Genome browser capture showing TEAD4 and SMAD2,3 co-localization on *MIXL1* and *EOMES* promoters. (D) siRNA-ChIP in YAP-depleted hESCs. Following siRNA transfection (48h), cells were treated with Wnt3a plus Activin A (W200A100, 4h) prior to qPCR-ChIP analysis of the *MIXL1* and *EOMES* genes, using the antibodies indicated in the legend. The location of the primers are indicated below the graphs. Mean (SD; n=2).

**Table S1, related to Figure 5. Wnt+Activin co-regulated genes in hESCs.** GRO-seq experiment in untreated, Wnt3a, Activin A and Wnt3a+Activin treated cells (t=6h). The table contains the list of 189 Wnt+Activin co-regulated genes. The co-regulated genes

are defined as those genes more active in the co-treatment condition than in any single treatment ( $FC > 1.25$ ). The columns are grouped as indicated: grey header; transcripts ID, yellow header; raw GRO-seq reads in each treatment, purple header; Activin-induced Fold Change, p value and adjusted p value, orange header; Wnt-induced Fold Change, p value and adjusted p value, blue header; Wnt+Activin-induced Fold Change, p value and adjusted p value.

## **SUPPLEMENTAL EXPERIMENTAL PROCEDURES**

### **hESCs culture**

H1 hESCs were cultured in mTeSR1 on Matrigel-coated (BD Biosciences) tissue culture plates. hESCs colonies were expanded manually at 1:3 split ratio every 5–7 d. Medium was replaced daily. For experiments, clumps were disaggregated into single cells at 1:6 split ratio following treatment with Accutase in presence of Rock inhibitors. Mouse recombinant Wnt3a (R&D 5036-WN-010), Activin A (Millipore GF300) and GSK3 inhibitor XV (Millipore 361558) was added to the mTeSR1 medium, unless otherwise indicated. Note: in our experience, different lots of these cytokines exhibit variation in their bioactivity.

### **Early Ectoderm differentiation**

hESCs colonies were disaggregated into single cells using accutase. hESCs were allowed to expand in mTeSR1 medium until they were nearly confluent (~3 days). The initial differentiation media contained knockout serum replacement media with 10  $\mu$ M TGF-beta inhibitor (SB431542, Millipore) and 200 ng/ml of Noggin (R&D). Cell media was replaced every day. Cells were collected following 2<sup>nd</sup> and 3<sup>rd</sup> day of differentiation and expression of early ectoderm markers were analyzed.

### **Mesendoderm differentiation**

For differentiation into ME lineages, hESCs clumps were disaggregated with accutase and cultured in matrigel-coated plates on mTeSR1 media. When cells reached sub-confluence, Activin A and Wnt3a (or GSK3 inhibitor XV) were added to the mTeSR1 media at indicated concentrations. Media and cytokines were replaced every day. ME markers were analyzed 24 and 48 after differentiation induction.

### **mRNA extraction and Quantitative PCR**

Total RNA was extracted using Trizol reagent (Life Technologies) following manufacturer indications. Then, 1  $\mu$ g of total RNA was reverse transcribed using Transcriptor First Strand Synthesis kit (Roche). Amplified material was detected using SYBR green master mix (Life Technologies) on an ABI7300 (Applied Biosystems) thermo-cycler. All results were normalized to a RPS23 gene control.

### **siRNA transfection**

hESCs were transfected with Lipofectamine RNAiMAX transfection reagent by following instructions from the supplier. Assays were performed 24-48 h after transfection, as indicated.

### **Chromatin Conformation Capture (3C) assays**

Chromatin conformation capture (3C) assays were carried out according to Gavrillov et al., 2009 with minor modifications. hESCs were disaggregated using accutase. When cells were nearly confluent, cells were crosslinked with 2% formaldehyde for 15 minutes at room temperature. The reaction was quenched with 125 mM glycine. After two washes with PBS1x, cells were lysed with 15 mL of ice cold lysis buffer (10 mM Tris-HCl

pH 8.0, 10 mM NaCl, 0.2% NP-40 and 1x complete proteinase inhibitors (Roche)). Following 20 minutes incubation on ice, nuclei were pelleted and resuspended in 0.5 mL of 3.1 restriction buffer (NEB) to 1.2x final concentration. Then, nuclei were incubated with vigorous shaking at 37°C, in presence of SDS 0.3%. Next, Triton X-100 was added at a final concentration of 1.8% and samples were placed in a shaker at 37°C for an additional 1h. DNA digestion was then carried out overnight at 37°C following addition of 1000 units of *BglII* or *BamHI* (for *EOMES* or *MIXL1* locus analysis, respectively). After enzyme inactivation (by addition of 1.3% SDS at 65°C, 20min) samples were incubated with 7 mL of 1x ligation buffer and 1% final concentration of Triton X-100, for 1 hour at 37°C. Then, 100 Units of T4 DNA ligase (Fermentas) were added and samples were incubated at 16°C overnight with slow agitation. To reverse cross-linking, DNA was incubated overnight at 65°C. Finally, DNA was phenol/chloroform extracted and precipitated with ethanol. BAC clone RP11-816O9 containing human *MIXL1* locus and BAC clone RP11-626E24 containing human *EOMES* locus were used as controls. Ten µg of the BAC clone were digested with 500 Units of *BamHI* (*MIXL1*) or *BglII* (*EOMES*) overnight at 37°C with agitation. Following phenol-chloroform extraction, DNA fragments were ligated with 50 Units of T4 DNA ligase at 16°C overnight with slow agitation. The ligated BAC DNA was then extracted with phenol/chloroform and precipitated with ethanol. Taqman probes flanking the *EOMES* promoter region and *MIXL1* -12Kb enhancer (M1), along with the primers were designed using Primer Express 3.0 (Applied Biosystems).

All primers were designed to anneal at and face the same ends of the *BglII* or *BamHI* sites, have melting temperatures of 58-60 °C and yield amplicons of 100-150 bp. Serial dilutions of the BAC DNA were used to generate the calibration curves and trendline equations. Primer pair efficiency was corrected using the corresponding equation in each qPCR. Amplification was performed using ABI7300 with initial denaturation at 95°C for 3 minutes, followed by 50 cycles of 94°C for 5 seconds and 60°C for 20 seconds. The interaction frequencies were calculated based on the amount of PCR products obtained from the anchor probe primer with each test primer pair compared to the control region. The control region spans from the anchor probe primer and a reverse primer inside the same restriction fragment. This control meant to be the positive control and to correct the total DNA in each sample. Normalized qPCR values were represented.

### **Sample treatments for ChIP-seq GRO-seq experiments.**

hESCs clumps were disaggregated into single cells using Accutase and plated in 10cm<sup>2</sup> dishes. When cells reached ~80% confluence, Wnt3a (200ng/ml), Activin A (100ng/ml), or combination of both Wnt3a+Activin A (W200A100) cytokines were added to the mTeSR1 media for the specified times.

For GRO-seq in YAP depleted cells: hESCs clumps were disaggregated into single cells using Accutase and plated in 10cm<sup>2</sup> dishes. The following day, cells were transfected using RNAimax (Invitrogen) with scramble (siC) or YAP specific siRNAs (siYAP). After 40h, transfected cells were treated with Wnt3a +Activin A (W200A100) or left untreated for 6 additional hours. Subsequently, cells were processed as indicated in the ChIP-seq and GRO-seq procedures sections (see below).

### ChIP-qPCR and ChIP-seq procedure

For ChIP experiments, approximately  $\sim 3 \times 10^6$  hESCs were double-crosslinked in plate. First, 0.2mM of di (N-succinimidyl) glutarate (DSG, Sigma, 80424) was added for 45 minutes at room temperature. Following two washes with PBS 1x, cells were incubated 20 min with 1% formaldehyde. Then cells were lysate in lysis-IP buffer and sonicated (4x60", amp 3). After precipitating the non sonicated chromatin, cell extract was pre-cleared with protein A/G at 4C, 1h. Aprox.  $\sim 500\mu\text{g}$  of total protein was used for IP. After addition of 5-10  $\mu\text{g}$  of antibody cell extracts were incubated overnight at 4°C. After four washes and reverse crosslinking, DNA was purified using Qiaquick PCR purification kit (Qiagen, 28106). For ChIP-qPCR, DNA was eluted in 75ul and 2ul was used for each qPCR reaction. Amplification was performed using SYBR Green master mix and was carried out in an ABI7300 device. Buffers: Lysis/IP buffer: 0.1% SDS, 1% Triton X-100, 0.15 M NaCl, 1 mM EDTA, 20 mM Tris pH 8, add fresh protease inhibitors. Wash buffer 1: 0.1% SDS, 0.1% NaDOC, 1% Triton X-100, 0.15 M NaCl, 1 mM EDTA, 20 mM HEPES. Wash buffer 2: 0.1% SDS, 0.1% NaDOC, 1% Triton X-100, 0.5 M NaCl, 1 mM EDTA, 20 mM HEPES. Wash buffer 3: 0.25 M LiCl, 0.5% NaDOC, 0.5% NP-40, 1 mM EDTA, 20 mM HEPES. Wash buffer 4: 1 mM EDTA, 20 mM HEPES. Elution buffer: 1% SDS, 0.1 M  $\text{NaHCO}_3$ .

The ChIP-seq procedure was essentially as described for ChIP-qPCR, with minor modifications. Two independent IP were performed for each condition and the DNA from the two replicates was pooled after the final elution. At least 5ng of total DNA was used to generate the libraries. ChIP DNA was end-repaired and 5' phosphorylated using T4 DNA Polymerase, Klenow and T4 Polynucleotide Kinase (Enzymatics). A single Adenine was added to 3' ends by Klenow (3-->5' exo-), and double-stranded Bioo Illumina Adapters (Bioo Scientific) were ligated to the ends of the ChIP fragments. Adapter-ligated ChIP DNA fragments were subjected to 15 cycles of PCR amplification using Q5 polymerase (NEB). AMPure beads were used to purify DNA after each step (Beckman Coulter). Library preparation and high-throughput sequencing using HiSeq 2500 device were carried out at Next Generation Sequencing Core, at Salk Institute.

### GRO-seq procedure

For GRO-seq experiments  $5 \times 10^6$  nuclei were used for run-on reaction. Nuclei isolation, run-on, RNA fragmentation and enzymatic TAP and PNK treatments were performed according to *Wang et al, 2011* with modifications. In brief, 10ml of swelling buffer (10 mM Tris/HCl pH 7.5, 2mM  $\text{MgCl}_2$ , 3mM  $\text{CaCl}_2$ , add fresh 2 U/ml Superase-In) was added to the plates and incubated for 5min on ice. Then, cells were scraped. Pelleted cells were then resuspended with gently shake in 1000  $\mu\text{l}$  of lysis buffer (Swelling buffer with 0.5 % IGEPAL CA-630, 10 % glycerol + 2 U/ml SUPERase-In). After 5min incubation on ice, 9ml of lysis buffer was added and centrifuged at 600x g, 4°C for 5 min. After washing with lysis buffer,  $10^7$  nuclei were resuspended in 100ul of Freezing buffer (40% glycerol, 5mM  $\text{MgCl}_2$ , 0.1mM EDTA, 50mM Tris pH7.5, 2U/ml SUPERase-In). Then, 50ul of run-on buffer (1.5mM Tris-Cl pH 8.0, 7.5 mM  $\text{MgCl}_2$ , 1.5 mM DTT, 450 mM KCL, 0.6U/ $\mu\text{l}$  of SUPERaseIn, 1.5% sarkosyl, 750uM ATP, GTP, and Br-UTP and 4.5  $\mu\text{M}$  CTP) was added. Run-on reactions were incubated during 5' at 30°C. For RNA hydrolysis, samples were treated with RNA fragmentation reagent (Ambion, AM8740) at 70C for 30min. BrU immunoprecipitation was done using anti BrDU beads from Santa Cruz (sc-32323 AC). Decapping, 3' de-phosphorylation and 5' phosphorylation were performed using sequential incubations with 0,5  $\mu\text{l}$  tobacco acid pyrophosphatase (TAP, 5 U, Epicentre), at 37°C for 1.5 h, then 1  $\mu\text{l}$  PNK at 37°C was added for 30'. Finally, additional 2ul of

PNK along with 20ul ATP 10 mM at 37°C for 30' was added for 5' phosphorylation. Required RNA purifications throughout the procedure were done using Trizol LS (Life Technologies) and Glycoblue co-precipitant (Life Technologies, AM9516) was added to facilitate RNA precipitation. Before sequencing, the RNA from two independent run-on reactions were pulled and libraries were prepared using NEBNext Multiplex Small RNA Library Prep Set for Illumina (NEB#E7300S/L) following manufacturers indications. The amplified barcoded retro-transcribed BrU-RNA was then sent to the Next Generation Sequencing core at Salk Institute and sequenced in Illumina HiSeq 2500 high-throughput sequencing device.

### **Indirect immunofluorescence**

hESCs were fixed with formaldehyde 2% 10min. After permeabilization with Triton 0.1% for 10min, cells were washed with PBS and incubated with blocking solution (PBS Tween 0.1%, BSA 0.1%, FBS 10%) for 30min at room temperature. Primary antibodies diluted in blocking solution were added and incubated overnight at 4°C. After washes, cells were incubated for 2h at room temperature with Alexa-conjugated secondary IgG antibodies. Finally, mounting media containing DAPI was added. Images were captured by Zeiss LSM 780 confocal microscope using ZEN 2011 software.

### **Coimmunoprecipitation**

hESCs were lysed with IPH buffer (50 mM Tris/HCl pH 8, 150 mM NaCl, 5 mM EDTA, 0.5% Nonidet P40, and Protease/Phosphatase Inhibitors (Roche) and incubated 20min on ice. After pelleted the cell debris, pre-cleared cell extracts were incubated with specific antibodies or normal IgGs overnight at 4°C. Then, protein A/G agarose beads (sc-2003) were added to the extract for additional 2h at 4°C. After 4 washes with the IPH buffer, bead conjugates were boiled and loaded into SDS-PAGE gels to analyze the co-immunoprecipitates.

### **Plasmids, antibodies, probes and primers**

Pgl3 basic and promoter vectors from Promega were used as backbones for our luciferases reporter assays. Subsequent cloning of promoter or enhancer sequences was performed using Gibson Assembly Cloning Kit (NEB #E5510). Ligation was done at 50°C during 15 min. Primers were designed using NEB builder for Gibson Assembly (<http://nebuilder.neb.com>) and are listed below. All inserts have between 400bp-1000bp and were amplified from genomic DNA by PCR. Other primers, probes as well as antibodies and siRNAs are listed below.

### **Luciferase Assays**

hESCs were plated into single cells using Accutase dissociation reagent. The next day, Pgl3-derived constructs together with pRL-SV40 Renilla control vector were co-transfected using Lipofectamine 3000 reagent (Invitrogen). Following 24h after transfection, hESCs were treated with the indicated cytokines. Then, cells were lysed and processed following Dual-Luciferase® Reporter Assay System Technical Manual (Promega). Luciferase activity was recorded in a 96- well plate luminometer (Thermo Labsystems Luminoskan Ascent). The values of the experimental reporter gene were normalized to Renilla values. The normalized values from three independent biological replicates are shown in the graphs.

### ChIP-seq analysis

ChIP fragments were sequenced in an Illumina HiSeq 2500 sequencer. Reads were aligned to the Human hg19 genome assembly (NCBI Build 37) using Bowtie2 (v2.1.0 PMID: 22388286). Only reads that mapped uniquely to the genome were considered for further analysis. Peak finding, motif finding, and peak annotation, genome browser read density files and read density histograms, heatmaps, and metagene profiles were performed using HOMER (v4.6, <http://biowhat.ucsd.edu/homer/>, PMID: 20513432). Genomic binding peaks for transcription factors were identified using the 'findPeaks' command in HOMER, with default settings of '-style factor': 200-bp peaks, with fourfold tag enrichment and 0.001 FDR significance over background (ChIP input), fourfold enrichment over local tags, and normalization to 10 million mapped tags per experiment. For  $\beta$ -catenin ChIP-seq, only peaks with more 30 reads were considered for the analysis. Histone modification ChIP-Seq parameters were found in similar many using the "-style histone" option, which allows for variable length peaks that may cover large areas. Peaks were assigned to gene targets based on the closest RefSeq defined TSS. Overlapping peaks were defined between peaks with direct overlap by at least on nucleotide. The ChIP-Seq read densities were visualized along the genome using IGV(<http://www.broadinstitute.org/igv/>, PMID: 22517427). Heatmaps were visualized using Java TreeView (<http://jtreeview.sourceforge.net/>, PMID: 15180930). De novo motif finding was performed using HOMER using 200 bp sequence fragments centered on ChIP-Seq peak summits. Background sequences were randomly chosen from the genome, matched for GC%.

For the analysis of  $\beta$ -catenin and SMAD peaks distance to the nearest co-regulated gene (Figure S5C and S5D), we selected those peaks encompassing a 100Kb region from the nearest co-regulated TSS. Among this set, those peaks that were closer to a non-coregulated gene than a co-regulated gene were excluded from the analysis.

### GRO-seq analysis

GRO-seq libraries were sequenced in an Illumina HiSeq 2500 sequencer. GRO-Seq reads were trimmed to remove 3' A-stretches originating from the library preparation. Each read was then aligned to the human hg19 genome assembly using Bowtie2. Only reads that mapped uniquely to the genome were considered for further analysis. Gene expression levels were calculated using HOMER by summing all + strand reads in gene bodies of RefSeq Genes. Gene counts were then analyzed for differential expression using edgeR. HOMER was used to generate normalized histograms, heatmaps, and genome browser visualization files. To identify Wnt3a and Activin A co-regulated genes, we selected those genes that were induced greater in the co-treatment than in any of the single treatments ( $FC > 2$ , adj P value  $< 0.05$ ). The resulting list contains 189 genes (Table S1). Gene ontology analysis of the 189 co-regulated genes was carrying out using DAVID Bioinformatics Resources 6.7 version. To identify those Wnt3a+Activin A genes more induced in YAP depleted cells, we compared the expression values of the 189 co-regulated genes in siYAP (W200A100) and siC (W200A100) conditions. In summary, we found that the nascent transcription of 89 out of the 189 co-regulated genes increased in the siYAP condition ( $FC > 1.25$ ). The list of the 89 YAP-repressed genes is shown in Figure S7A.



## List of Antibodies and siRNAs

| Antibody           | Company        | Reference | Specie | Application     |
|--------------------|----------------|-----------|--------|-----------------|
| $\beta$ -catenin   | Santa Cruz     | sc-7199   | Rb     | ChIP/ChIPseq/WB |
| LEF-1              | Home made      | ----      | Rb     | ChIP/ChIPseq/WB |
| Total RNAPII (N20) | Santa Cruz     | sc-899    | Rb     | ChIP/ChIPseq    |
| Ser5P-RNAPII       | Millipore      | 05-623    | Ms     | ChIP/ChIPseq    |
| Ser2P-RNAPII       | Covance        | mms-129r  | Ms     | ChIP/ChIPseq    |
| Ser7P-RNAPII       | Active Motif   | 61087     | Ms     | ChIP/ChIPseq    |
| NIPBL              | Bethyl         | a301-779a | Rb     | ChIP/ChIPseq    |
| H3K27ac            | Abcam          | ab4729    | Rb     | ChIP/ChIPseq    |
| H3K27me3           | Millipore      | 07-449    | Rb     | ChIPseq         |
| H3K4me1            | Abcam          | ab8895    | Rb     | ChIP            |
| H3                 | Abcam          | ab1791    | Rb     | ChIP            |
| SMAD2/3            | Santa Cruz     | sc-8332x  | Rb     | ChIP            |
| P300               | Santa Cruz     | sc-584    | Rb     | ChIP            |
| BRG1               | Santa Cruz     | sc-17796  | Ms     | ChIP            |
| RAD21              | Abcam          | ab992     | Rb     | ChIP            |
| SMC3               | Abcam          | ab9263    | Rb     | ChIP/WB         |
| SMC1               | Bethyl         | a300-055a | Rb     | ChIP/WB         |
| EZH2               | Millipore      | 17-662    | Ms     | ChIP            |
| CDK9               | Santa Cruz     | sc-8338   | Rb     | ChIP/WB         |
| YAP1               | Cell Signaling | 4912S     | Rb     | WB              |
| GATA6              | R&D            | af1700    | Goat   | IF/WB           |
| SOX1               | Cell Signaling | 4194S     | Rb     | WB              |
| Oct3/4             | Santa Cruz     | sc-9081   | Rb     | IF/WB           |
| DDX39              | Abcam          | ab50697   | Ms     | WB              |
| CRSP70             | Santa Cruz     | sc-48776  | Rb     | WB              |
| $\beta$ -catenin   | Santa Cruz     | sc-7963   | Ms     | WB              |
| NELF-A             | Santa Cruz     | sc-32911  | Rb     | ChIP            |
| NELF-A             | Bethyl         | A301-910A | Rb     | ChIP            |
| TEAD4              | Abcam          | ab58310   | Ms     | ChIP            |
| TAZ                | Cell Signaling | 4883S     | Rb     | WB              |
| YAP1               | Santa Cruz     | sc-101199 | Ms     | ChIP            |

| siRNA            | Company                    | Reference | Specie | Application  |
|------------------|----------------------------|-----------|--------|--------------|
| CONTROL          | Silencer Select Life Tech. | #1        | Human  | Transfection |
| NIPBL            | Silencer Select Life Tech. | s24588    | Human  | Transfection |
| YAP1             | Silencer Select Life Tech. | s20366    | Human  | Transfection |
| CDK9             | Silencer Select Life Tech. | s2834     | Human  | Transfection |
| TAZ              | Silencer Select Life Tech. | s24789    | Human  | Transfection |
| SMAD2/3          | Santa Cruz                 | sc-37238  | Human  | Transfection |
| $\beta$ -catenin | Santa Cruz                 | sc-29209  | Human  | Transfection |
| MED26            | Santa Cruz                 | sc-38573  | Human  | Transfection |
| SMC3             | Santa Cruz                 | sc-38391  | Human  | Transfection |
| TEAD4            | Santa Cruz                 | sc-96187  | Human  | Transfection |

| List of Primers              |             |                                                          |
|------------------------------|-------------|----------------------------------------------------------|
| Name and distance to TSS     | Application | Fw/Rw                                                    |
| MIXL1 -12.76 Kb LEF enhancer | ChIP        | GCCTTTCATCTGAGCCTTTG<br>AGCATTGAAATGGGGAAGTG             |
| MIXL1 -295bp SMAD enhancer   | ChIP        | GAT TTG ACC CGG AGA AGA GA<br>CAT CCC CGA AGG ACT ATT TG |
| MIXL1 +360bp                 | ChIP        | AGCTGCTGGAGCTCGTCTT<br>CCTGAACAGACCTGGAGGAG              |
| MIXL1 +796bp                 | ChIP        | GACACAGATGAGGGGCAGTT<br>GCTCAAAGCCAGAGGAAAAC             |
| MIXL1 +2625bp                | ChIP        | CGTCTCTTCAACCCTCATCC<br>GTGAAGATGACAGGCCCAAT             |
| MIXL1 +3.174 bp (close TTS)  | ChIP        | AATACCTTTTGGGGGCTGTT<br>TGGCCTCACTTTGATTTCTT             |
| EOMES -44Kb LEF enhancer     | ChIP        | GACTTTCTGAATGGGCAGGA<br>CCAAGGCTTTGATCTTCCAG             |
| EOMES -9KB LEF enhancer      | ChIP        | CTGATACCCTGCCCTGTGAT<br>GTCCTCCGCTTTGATCTGAC             |
| EOMES -0.1Kb                 | ChIP        | GGGCTGTCACTAGCTGCTTT<br>ACCAGCCAATAGGAGGGTCT             |
| EOMES +1.2Kb SMAD enhancer   | ChIP        | GCTTGTGGACATGCCCTAAT<br>CCTGAACAGACCTGGAGGAG             |
| EOMES +1.8Kb                 | ChIP        | TGCCCAACATCGGTATATT<br>AATATGAGCCTTCGGAAGCA              |
| EOMES +4.9Kb (close TTS)     | ChIP        | GGGGAGGTTCGAGGTTCTTAC<br>ATGGTAGTCCAGCTGCCATC            |
| NODAL -14Kb enhancer         | ChIP        | TGCATTCCTCCACTAACATCA<br>ATTAGCTCTCCAGGCTTCC             |
| Negative control region      | ChIP        | GCCTCAGGTGATCCTCTCAC<br>GGCATTGTGGCATGTAAGTG             |
| MIXL1                        | cDNA        | AGCTGCTGGAGCTCGTCTT<br>GCAAGTGGATGTCGGGGTA               |
| EOMES                        | cDNA        | ACTGTTCCCACTGGATGAG<br>ATTTGCGCCTTTGTTATTGG              |
| T                            | cDNA        | ACGCCATGTACTCCTTCCTG<br>TGAGCTTGTTGGTGAGCTTG             |
| Gata6                        | cDNA        | AGCGACTCCAGAGCCTTTC<br>AGGAGGAGGACGAGGAAGAG              |
| SOX17                        | cDNA        | TTTCATGGTGTGGGCTAAGG<br>TTGTGCAGGTCTGGATTCTG             |
| LEF-1                        | cDNA        | TGGAGGCCTCTACAACAAGG<br>GATGGGTGGAGAAAGAGATCC            |

|                          |                                       |                                                                                                    |
|--------------------------|---------------------------------------|----------------------------------------------------------------------------------------------------|
| CXCR4                    | cDNA                                  | GGTGGTCTATGTTGGCGTCT<br>CTCACTGACGTTGGCAAAGA                                                       |
| RPS23                    | cDNA                                  | TGTCGTGGACTTCGTACTGC<br>ATGCCACTTCTGGTCTCGTC                                                       |
| LEFTY1                   | cDNA                                  | AACAGCGAGCTGGTGCAG<br>CAGCCACTCGACGGTCAC                                                           |
| ID1                      | cDNA                                  | CTCCAGCACGTCAATCGACTA<br>GATTCCGAGTTCAGCTCCAA                                                      |
| FOXA2                    | cDNA                                  | GACCTCTTCCCCTTCTACCG<br>GGCACCTTCAGGAAACAGTC                                                       |
| AXIN2                    | cDNA                                  | CTTTGTGACCAAGCAGACGA<br>GCATGGTGGTGGATGTAGTG                                                       |
| NODAL                    | cDNA                                  | GAGATTTTCCACCAGCCAAA<br>AGGTGACCTGGGACAAAGTG                                                       |
| PAX6                     | cDNA                                  | GGGCAATCGGTGGTAGTAA<br>TTTCCCAAGCAAAGATGGAC                                                        |
| SOX1                     | cDNA                                  | CACAACTCGGAGATCAGCAA<br>CTCGGACATGACCTTCCACT                                                       |
| POU5F1                   | cDNA                                  | AGAAGGATGTGGTCCGAGTG<br>GCCTCAAATCCTCTCGTTG                                                        |
| OTX2                     | cDNA                                  | AAGCACTGTTTGCCAAGACC<br>CGGGCAAGTTGATTTTCACT                                                       |
| EOMES -44Kb enhancer     | cloned into pgl3 basic and pgl3 SV40p | gtaaaatcgataaggatccgtcgacAAGAGAAGAGAGGGATACAG<br>aaggctcaagggcatcggtcgacCTTCAAATCTTATCTAATTGAGACTC |
| MIXL -12Kb enhancer      | cloned into pgl3 basic and pgl3 SV40p | CGGGgtcgacCGTATTGTACAAAGTCCCCTCCTC<br>CGGGgtcgacCGTAGCTTTACAGCCTGGAGCAAC                           |
| KLF5 -20Kb enhancer      | cloned into pgl3 basic                | aaatcgataaggatccgtcgacGTTTTAATAGTAAAAACCATATTTGGG<br>tctcaagggcatcggtcgacTGTTGTTCTGTGCTTTATAGG     |
| NODAL -25Kb enhancer     | cloned into pgl3 basic                | aaatcgataaggatccgtcgacTCTCTGGCTTTTCAAAACCCATG<br>tctcaagggcatcggtcgacAGCACCATGCCTGGCACA            |
| MIXL1 promoter           | cloned into pgl3 basic                | cgggAGATCTcgggTTAGGGAGGCTTGCAAGA<br>cgggAAGCTTcgtacCGGGGCCGCACTTATA                                |
| MIXL1 SMAD -5Kb from TSS | cloned into pgl3 basic                | aaatcgataaggatccgtcgacCCTCTCCACCAAGCCCAT<br>tctcaagggcatcggtcgacACTACTGCCTATTGAAAGAAC              |
| EOMES promoter           | cloned into pgl3 basic                | ctagcccgggctcgagatctCCTAACTGTGGGGCTGTTAG<br>agcttacttagatcgagatctTACTGCGCTACTGGCGC                 |
| KLF5 promoter            | cloned into pgl3 basic                | ctagcccgggctcgagatctAGATACACAGGGACAAGAGC<br>agcttacttagatcgagatctTGGACTCCTCAGACAGCG                |
| NODAL promoter           | cloned into pgl3 basic                | ctagcccgggctcgagatctCACCCCGTTGGCTCCATC<br>agcttacttagatcgagatctGCAGCACCTCCAGCCCTT                  |
| ID1 promoter             | cloned into pgl3 basic                | ctagcccgggctcgagatctAACACCAAGCAGATATTAATATTAGG<br>agcttacttagatcgagatctACAGAATGGCAAAGCGA           |

|                                   |    |                             |
|-----------------------------------|----|-----------------------------|
| EOMES probe (promoter)            | 3C | CCTGGGAGGAGGGTG             |
| EOMES Positive control (rev) prom | 3C | CACCTTCTTCCAGCGTGTGA        |
| EOMES TSS (anchor)                | 3C | TTCCTTCCCTCGTACCTCTTGCT     |
| EOMES -2.6Kb                      | 3C | GAAAAGCACTGTTTCAGCTACAGATC  |
| EOMES -4Kb                        | 3C | TTGGCCCTTTGTTCTCTGATG       |
| EOMES -6.3Kb                      | 3C | GCGGCATCTGCAAATTAAGG        |
| EOMES -8Kb                        | 3C | CCCACCCCTCCTTTGTC           |
| EOMES -10Kb                       | 3C | TCTTGTTCTGTTGCCAAGCT        |
| EOMES -26Kb                       | 3C | ACAGTTCCTTTTCTTTGGTAGTTGT   |
| EOMES -33Kb                       | 3C | AAGAAGACTCACTTTTCATCGATGGT  |
| EOMES -41Kb                       | 3C | CATGTCTTGGAGAATGTTTCATGTT   |
| EOMES -42Kb                       | 3C | TTTGGATTCCCAATTGAGATCT      |
| EOMES -47Kb                       | 3C | CTGCCCATTTGGGTAGAGATCT      |
| MIXL1 probe (-12Kb, enhancer)     | 3C | CTCAAATGGTGGTCGCTCAGGCAGT   |
| MIXL1 Positive control (rev) enh  | 3C | CTCCATGTTAATGGCAAACCTCAGT   |
| MIXL1 -12Kb (anchor)              | 3C | GGGTTCCAGCATTTCTACAAC       |
| MIXL1 -11Kb                       | 3C | TTGGACGGAGCTGTGTGTGA        |
| MIXL1 -7.6Kb                      | 3C | AACCACAATTCCATTATCTCACATCTA |
| MIXL1 -2.9Kb                      | 3C | CCAGACTGGGCTGCTGTAGAA       |
| MIXL1 -0.6Kb                      | 3C | GCTGCCCCCTGGATCC            |
| MIXL1 TSS                         | 3C | AGCTGCTGGAGCTCGTCTTC        |

## SUPPLEMENTAL REFERENCES

Wang D, Garcia-Bassets I, Benner C, Li W, Su X, Zhou Y, Qiu J, Liu W, Kaikkonen MU, Ohgi KA, Glass CK, Rosenfeld MG, Fu XD. **Reprogramming transcription by distinct classes of enhancers functionally defined by eRNA.** Nature. 2011 May 15;474(7351):390-4. doi: 10.1038/nature10006.

Gavrilov A, Eivazova E, Priozhkova I, Lipinski M, Razin S, Vassetzky Y. **Chromosome conformation capture (from 3C to 5C) and its ChIP-based modification.** Methods Mol Biol. 2009;567:171-88. doi: 10.1007/978-1-60327-414-2\_12.
